# Supplementary material for: WASH phosphorylation balances endosomal versus cortical actin network integrities during epithelial morphogenesis
Source: PubMed Central journal article supplement (PMC6522504; doi:10.1038/s41467-019-10229-6), 2019-05-16
Supplement: 41467_2019_10229_MOESM1_ESM.pdf [file 41467_2019_10229_MOESM1_ESM.pdf]

Supplementary Information

**WASH phosphorylation balances endosomal versus cortical actin network integrities during epithelial morphogenesis**

Tsarouhas *et al.*, 2019

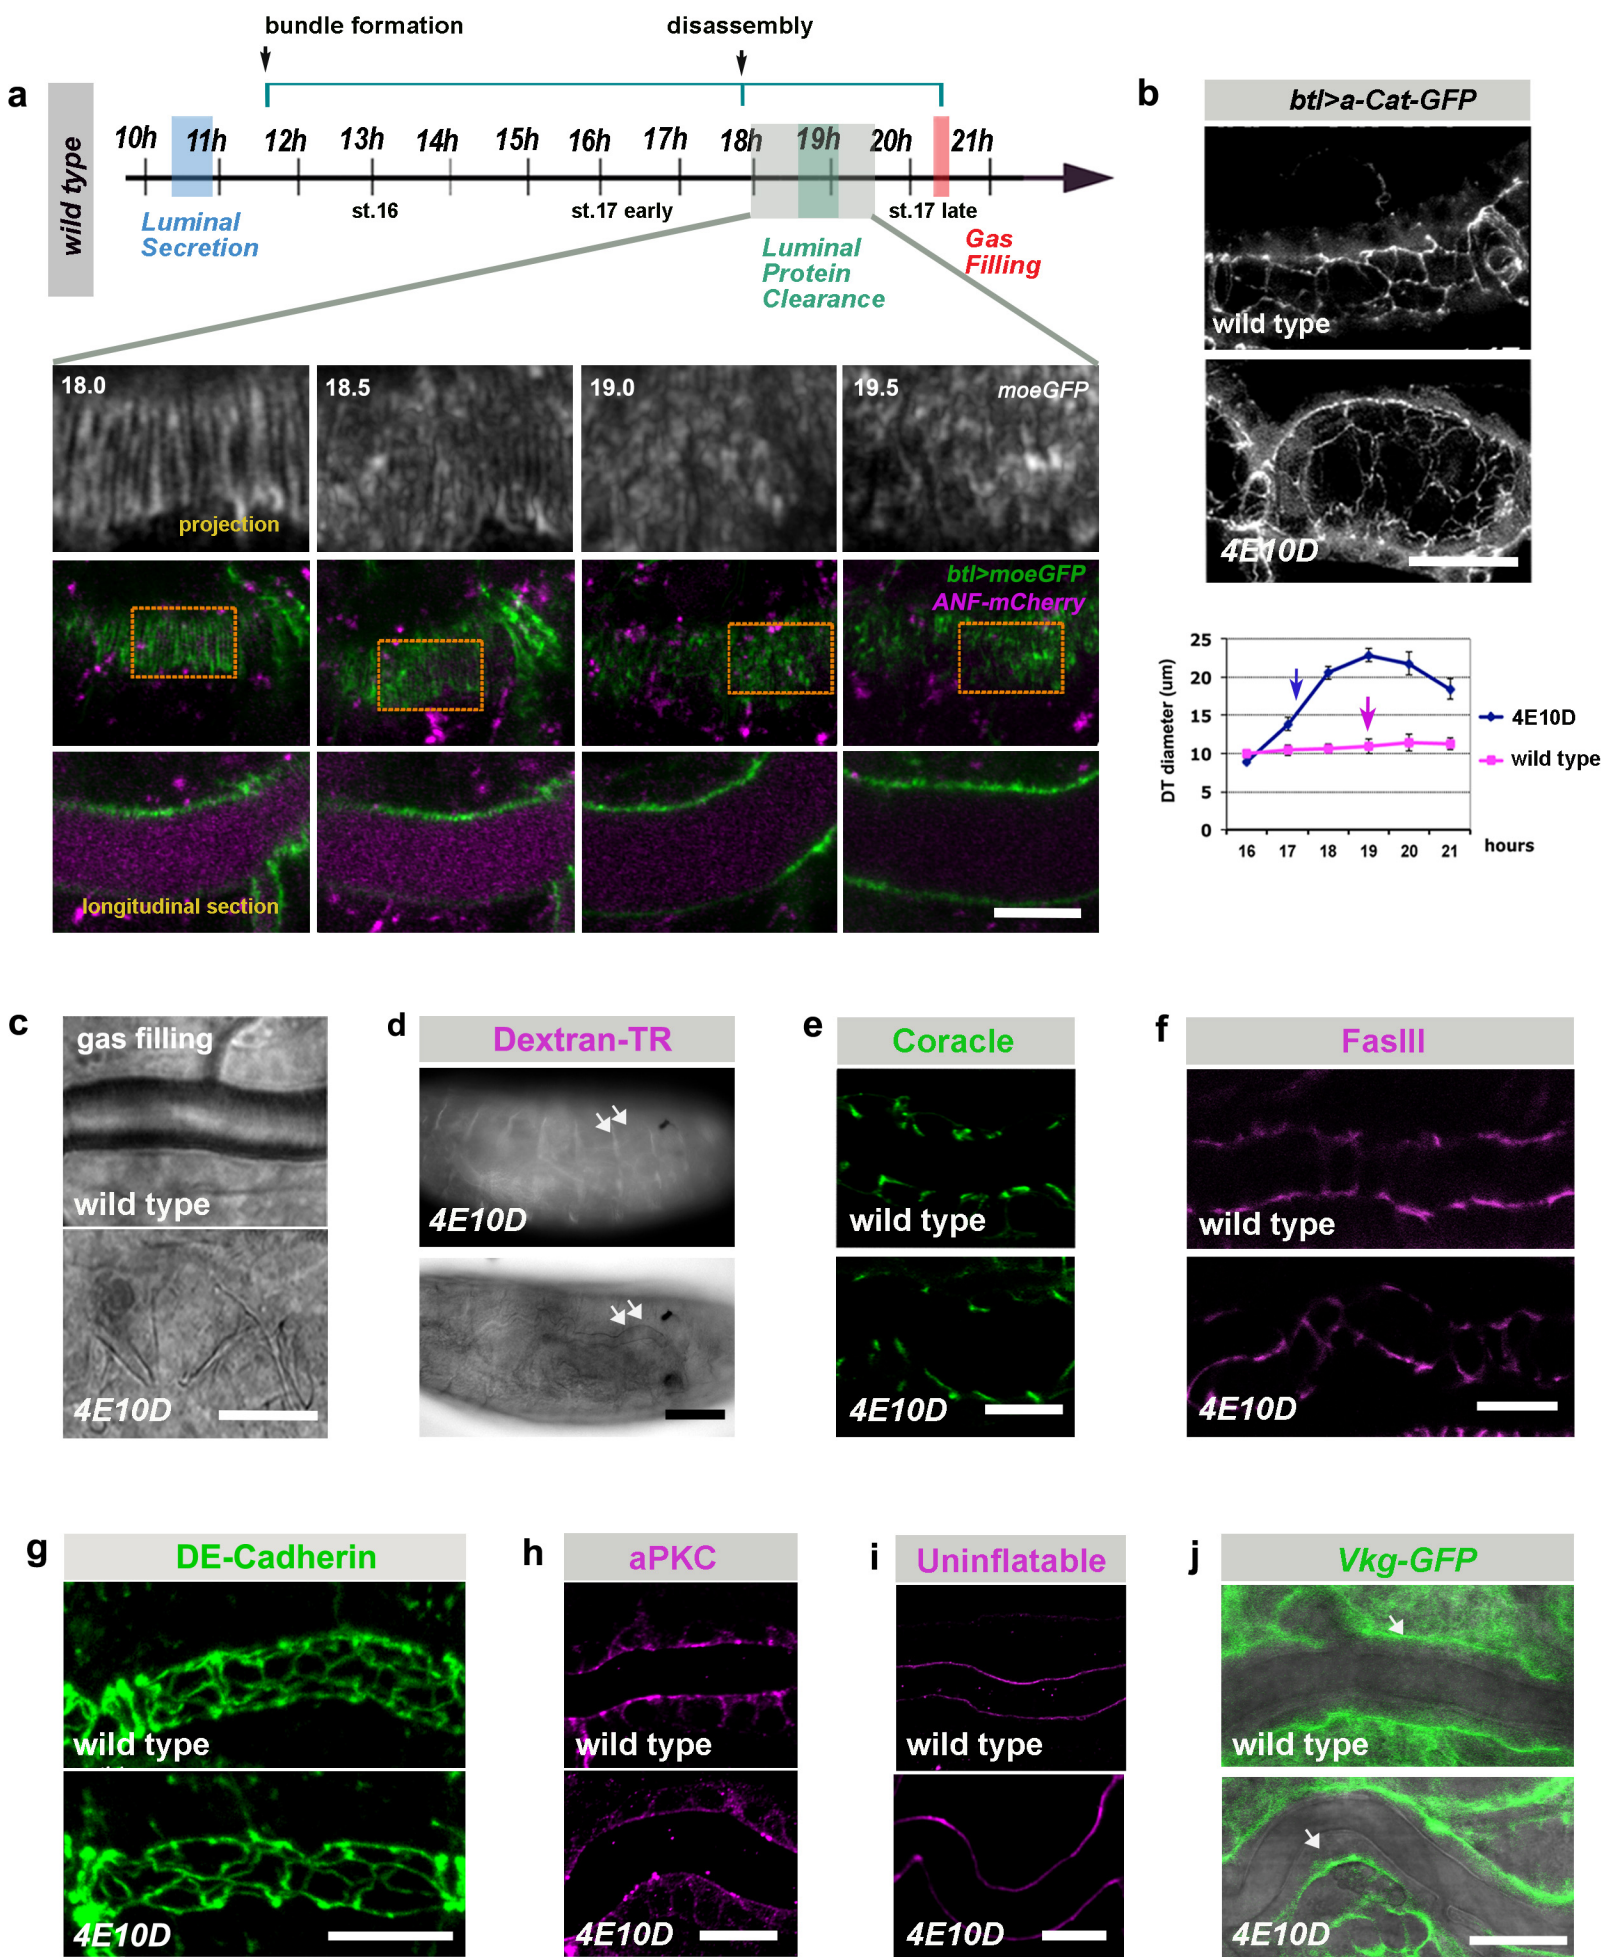

Figure S1

**Supplementary Figure 1. *Ptp4Etp10D* mutants show impaired tube growth but intact tracheal patterning and epithelial integrity.**

(a) Schematic representation of the perpendicular actin bundles in relation to the time of embryo development AEL (hours). Actin-bundles perpendicular to the tube axis (11.5-18.0 h AEL) are observed. A progressive loss of actin-bundles (18.0 h AEL and onwards) occurs concurrently to the initiation of luminal protein clearance in wild type embryos (green line, arrows).

Airyscan confocal of the DT in living wild-type embryos expressing *btl>moeGFP* (green) and *btl>ANFCherry* (magenta) (projections). Images in the upper row denote zoomed areas indicated by the rectangular frames. The conspicuous actin bundles (18.0h AEL) become weaker and turn into actin patches just before (18.5 h AEL) and during luminal clearance (19.0-19.5 h AEL) (longitudinal sections).

(b) DT in living late stage 17 wild-type and *Ptp4Etp10D* embryos expressing *btl> $\alpha$ -Catenin-GFP* (grey scale). Diameter expansion rates of DT (Tr10) (16-21 h AEL) in wild-type ( $n = 5$ ) and *Ptp4Etp10D* ( $n = 8$ ) mutant embryos expressing *btl-moeRFP* (graph panel). Time points of luminal protein clearance (arrows).

(c) Widefield images of a wild-type and *Ptp4Etp10D* mutant embryo 21 hours (AEL). *Ptp4Etp10D* mutants show gas filling defects and collapsed trachea.

(d) Fluorescent (upper) and widefield (lower) images of *Ptp4Etp10D* mutant embryos injected with 10 kDa Dextran-TR at late stage 16 (15 h AEL). The dye was excluded from the tracheal lumen in wild-type ( $n = 37$ ) or *Ptp4Etp10D* ( $n = 36$ ) (arrows) but was detected in *Mtf* mutants ( $n = 18$ ) (negative control).

(e, f) Confocal images of the tracheal DT of wild-type and *Ptp4Etp10D* mutant embryos stained for the septate junction components Coracle (green) (e) or Fasciclin III (FasIII, magenta) (f).

(g) Confocal images of the DT of living wild-type and *Ptp4Etp10D* mutant embryos expressing endogenous DE-Cadherin-GFP (knock-in).

(h, i) Confocal images showing the DT of wild-type and *Ptp4Etp10D* mutant embryos stained for the apical proteins, aPKC (magenta) (h) and Uninflatable (magenta) (i).

(j) Merged fluorescent/widefield images of living wild-type and *Ptp4Etp10D* mutant embryos expressing the basal membrane marker for collagen type IV, Viking (Vkg)-GFP (green) (arrow).

Scale bars, 10  $\mu$ m (a-c, e-j), 50  $\mu$ m (d). Embryos in (e) to (j) are late stage 16 to 17.

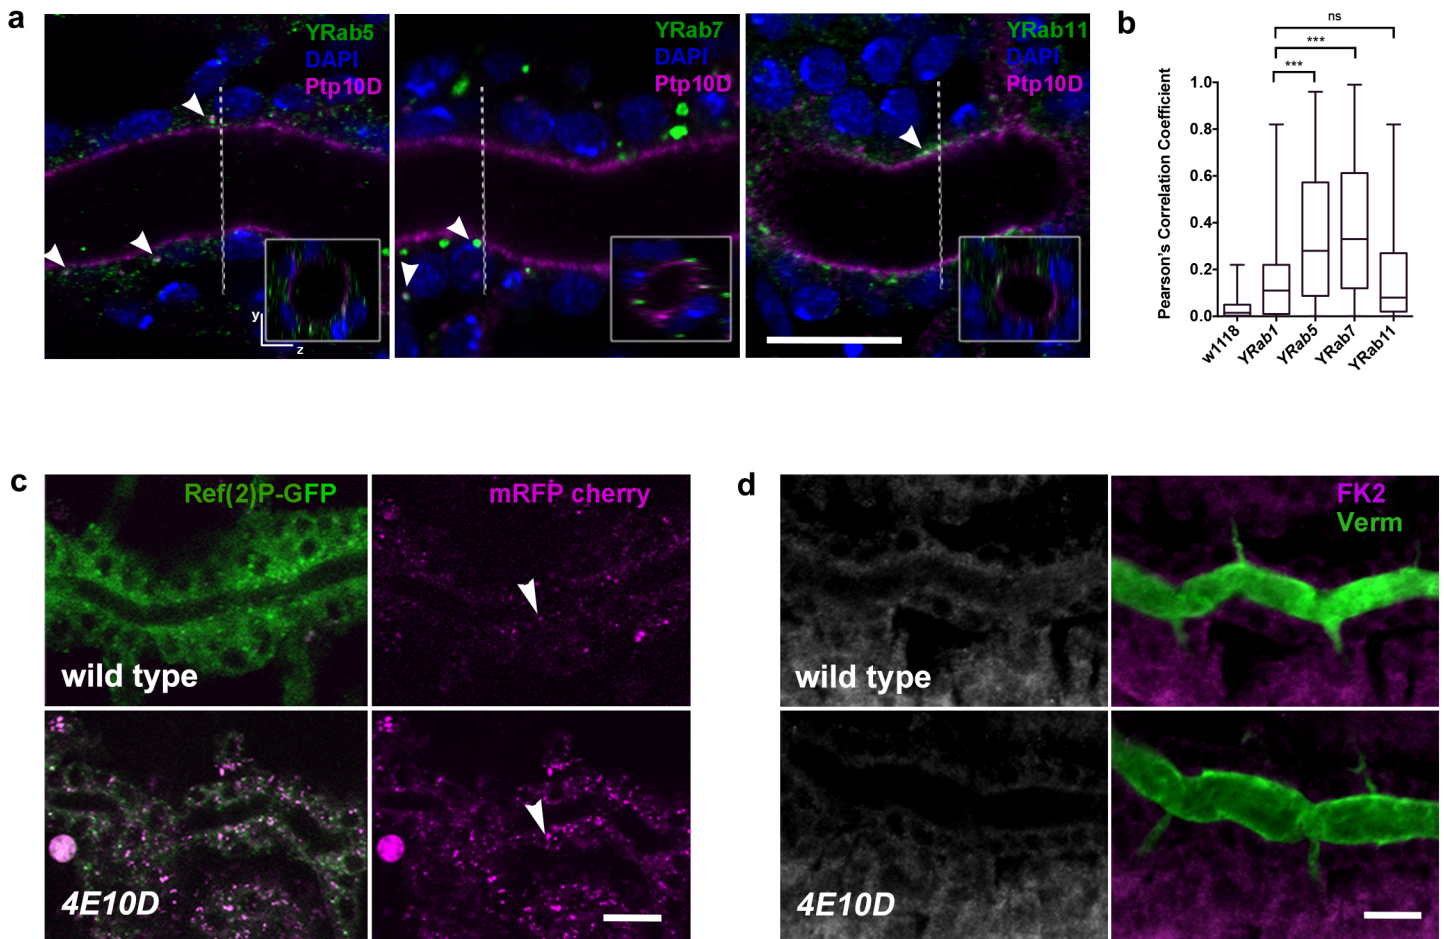

**Supplementary Figure 2. *Ptp4Etp10D* mutants show enhanced lysosomal degradation.**

(a) Confocal images of the tracheal DT in wild-type embryos expressing endogenous Rab-YFP (knock-in) proteins YFP-Rab5 or YFP-Rab7 or YFP-Rab11, stained with anti-Ptp10D (8B22F5, Cy3-magenta), anti-GFP (green) antibodies and DAPI (blue). Insets show cross section views of the DT ( $y$ - $z$  plane) in the indicated DT position (vertical lines). Ptp10D localizes on the apical membrane and in the endocytic compartments of tracheal cells (arrowheads). (b) Pearson's correlation coefficient  $r$  of intracellular Cy3-Ptp10D puncta versus GFP signals in airways of *w1118* (control of GFP antibody,  $n = 56$  Ptp10D puncta,  $n = 3$  embryos) or YRab1 ( $n = 287$  Ptp10D puncta,  $n = 9$  embryos) or YRab5 ( $n = 266$  Ptp10D puncta,  $n = 10$  embryos) or YRab7 ( $n = 346$  Ptp10D puncta,  $n = 8$  embryos) or YRab11 ( $n = 168$  Ptp10D puncta,  $n = 6$  embryos) embryos. Rab1 mediates membrane trafficking between ER and Golgi and used as a negative control of the endocytotic Rabs. \*\*\*,  $P < 0.001$  (unpaired two tailed  $t$ -tests). *ns*, not significant ( $P > 0.05$ ).

(c) Confocal sections of the tracheal DT of living stage 17 wild-type and *Ptp4Etp10D* mutant embryos expressing the *Drosophila* p62 Ref(2)P-GFP-mCherry reporter. *Ptp4Etp10D* mutants show high levels of mCherry (acidic compartments) but decreased GFP signal compared to wild-type. (d) Confocal images of the tracheal DT of early stage 17 wild-type and *Ptp4Etp10D* mutant embryos stained for the ubiquitin marker FK2 (magenta) and the luminal protein Verm (green). Note the reduced ubiquitin signal in tracheal cells of *Ptp4Etp10D* mutants in comparison to wild type. Scale bars, 10  $\mu$ m.

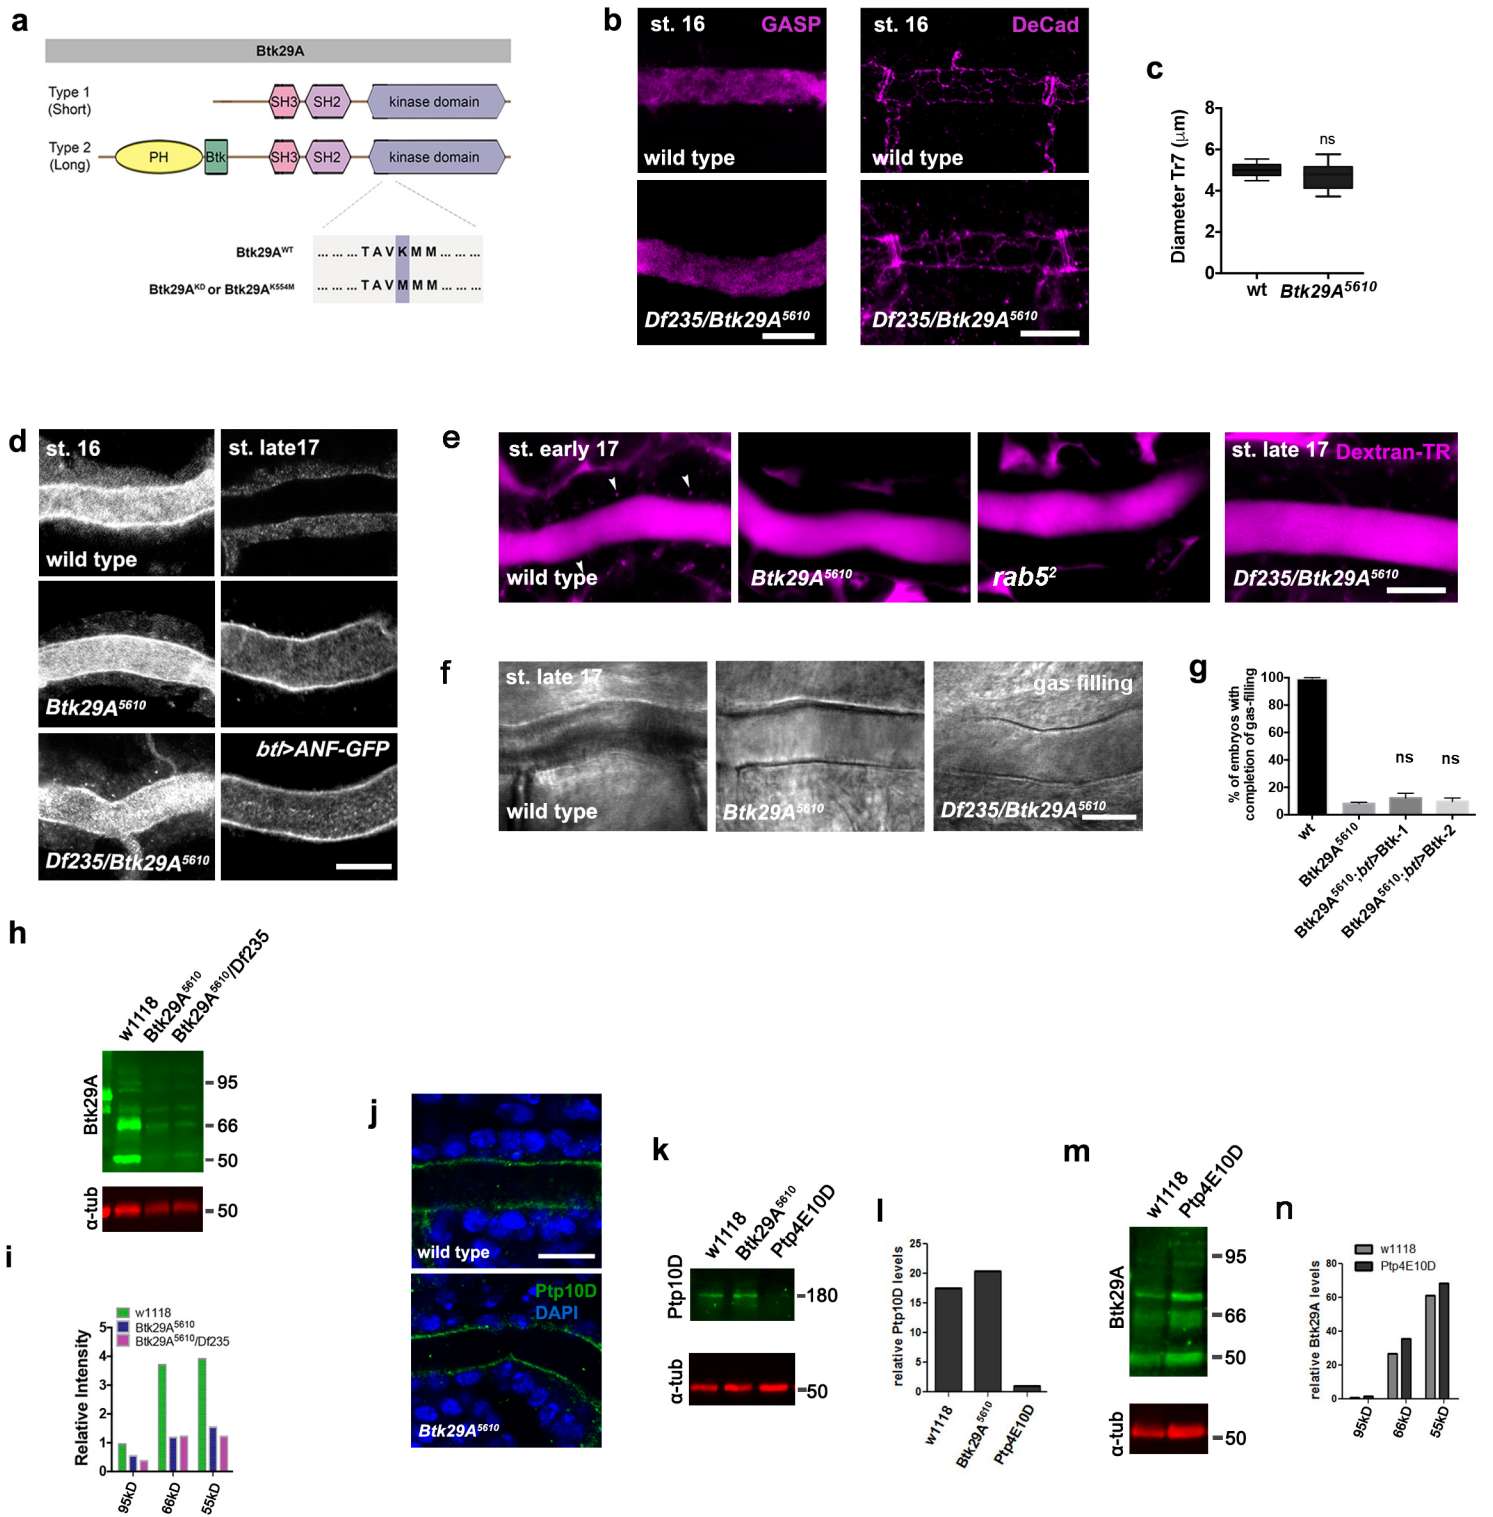

Figure S3

### Supplementary Figure 3. Btk29A is required for luminal endocytosis.

(a) Schematic representation of *Drosophila* Btk29A protein. Btk29A consists of SH3, SH2 and kinase domain (Type 1 or Short isoform), a BTK domain and a PH domain (Type 2 or Long isoform). Domains shown: pleckstrin homology (PH); Btk homology region (Btk); Src-homology 3 (SH3); Src-homology 2 (SH2); tyrosine kinase domain. The single amino acid substitution in the kinase domain (K554M) of the Type 2 (or long isoform) is indicated.

(b) Confocal images of the tracheal DT of wild-type and *Df235/Btk29A<sup>5610</sup>* mutant embryos stained for the luminal antigen GASP (magenta, upper row) or DE-Cadherin (magenta, lower row). (c) Plots showing the average diameter (Tr7) of stage 16 wild-type ( $n = 13$ ) and *Btk29A<sup>5610</sup>* embryos ( $n = 14$ ). *ns*, not significant ( $P > 0.05$ ), (unpaired two tailed *t*-tests).

(d) Confocal images showing the DT of stage 16 and late stage 17 wild-type, *Btk29A<sup>5610</sup>* and *Df235/Btk29A<sup>5610</sup>* mutant embryos expressing *btl>ANF-GFP*. Embryos were stained with anti-GFP (gray scale). (e) Confocal frames showing the DT of living wild-type, *Btk29A<sup>5610</sup>*, *rab5<sup>2</sup>* and *Df235/Btk29A<sup>5610</sup>* embryos subjected to Dextran-TR endocytic assay. Images depict tracheal DT, just before (first three images) and after (last image) luminal clearance. (f) Wide-field images showing the gas filling defects in *Btk29A<sup>5610</sup>* and *Df235/Btk29A<sup>5610</sup>* compared to wild type.

(g) Plots showing the percentage of wild-type ( $n = 54$ ), *Btk29A<sup>5610</sup>* ( $n = 67$ ), *Btk29A<sup>5610</sup>;btl>Btk29A-1* (type-1) ( $n = 58$ ) and *Btk29A<sup>5610</sup>;btl>Btk29A-2* (type-2) ( $n = 72$ ) embryos that complete gas-filling. *ns*,  $P > 0.05$  (unpaired two tailed *t*-tests). (h, i) Western blot analysis of wild-type, *Btk29A<sup>5610</sup>* and *Btk29A<sup>5610</sup>/Df235* mutant embryos using a rat anti-Btk29A antibody (h). The Btk29A/ $\alpha$ -tubulin signal ratio was calculated for each of the 3 isoforms (95, 66 and 55 kDa) (i). The western blot signal quantification was measured with the representative blot (h) from at least 3 independent experiments. (j) Confocal images of the tracheal DT of *Btk29A<sup>5610</sup>* embryos stained for Ptp10D (green) and DAPI (blue). (k, l) Western blot analysis of Ptp10D (8B22F5 and 45E10, antibody mix) in wild-type, *Btk29A<sup>5610</sup>* and *Ptp4Etp10D* mutants.  $\alpha$ -tubulin (loading control) (k). Ptp10D/ $\alpha$ -tubulin signal ratio (l). The western blot signal quantification refers to representative blot (k). This outcome was reproducible in three independent Western blot experiments ( $n = 3$ ). (m, n) Western blot analysis of Btk29A in wild-type and *Ptp4Etp10D* mutant embryos.  $\alpha$ -tubulin (loading control) (m). The Btk29A/ $\alpha$ -tubulin signal ratio (n). The western blot signal quantification refers to the representative blot (m) and it was reproducible in 3 independent experiments ( $n = 3$ ). Scale bars, 10  $\mu$ m.

**a**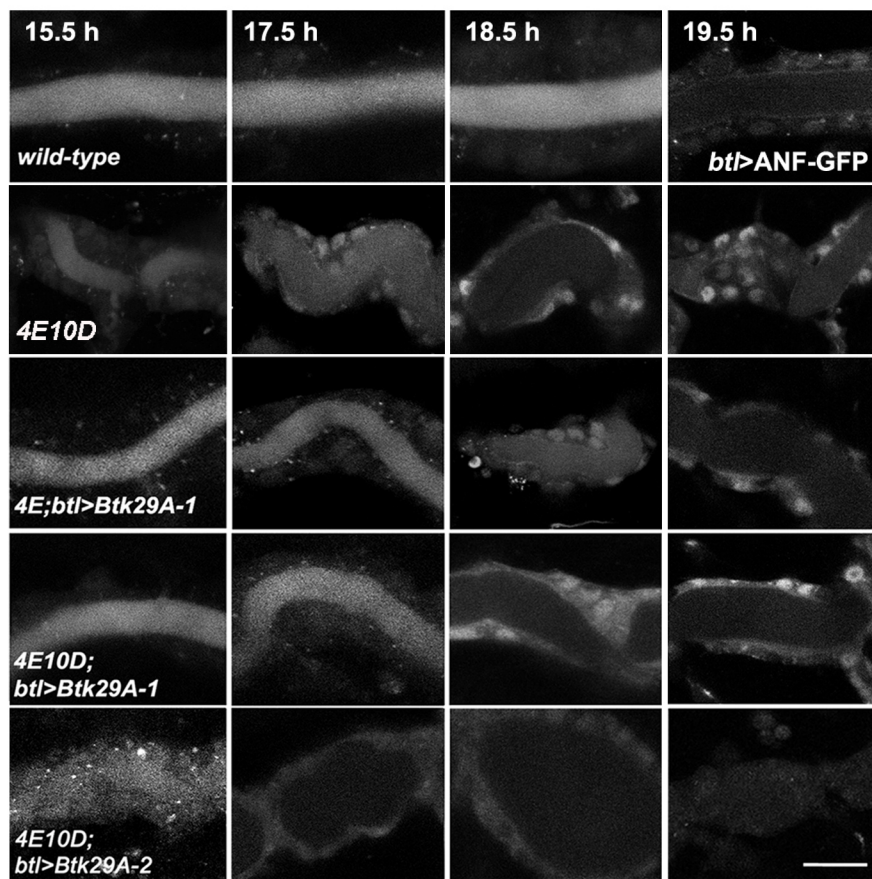**b**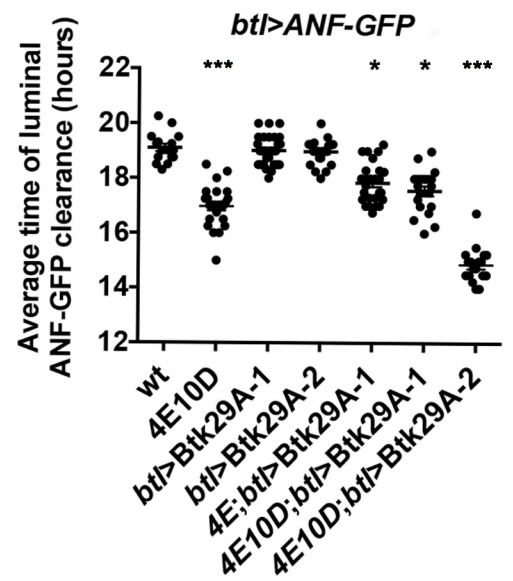

#### Supplementary Figure 4. PTPs antagonize Btk29A during luminal clearance.

(a) Confocal frames showing the DT of living wild-type, *Ptp4EPtp10D*, *Ptp4E, btl>Btk29A-1* (type-1), *Ptp4EPtp10D, btl>Btk29A-1* (type-1) and *Ptp4EPtp10D, btl>Btk29A-2* (type-2) embryos expressing *btl>ANF-GFP* (grey scale). *Ptp4E* mutants (but not wild-type) embryos expressing Btk29A in the tracheal cells show over-elongated DT and premature luminal ANF-GFP clearance. These phenotypes are enhanced in *Ptp4EPtp10D; btl>Btk29A-2* embryos. Time points depict hours AEL.

(b) Plots depicting the average time (hours) of ANF-GFP luminal clearance in wild-type ( $n = 17$ ), *Ptp4EPtp10D* ( $n = 24$ ), *btl>Btk29A-1* ( $n = 28$ ), *btl>Btk29A-2* ( $n = 25$ ), *Ptp4E, btl>Btk29A-1* ( $n = 26$ ), *Ptp4EPtp10D, btl>Btk29A-1* ( $n = 17$ ) and *Ptp4EPtp10D, btl>Btk29A-2* ( $n = 18$ ) embryos. *Ptp4E, btl>Btk29A-1* activated luminal ANF-GFP clearance 56 min earlier. Scatter plot shows data points and corresponding mean (horizontal line). Unpaired two tailed *t*-tests were performed in relation to wild-type data set of experimental mean values. \*,  $P < 0.012$ , \*\*\*,  $P < 0.0001$ , (unpaired two tailed *t*-tests).

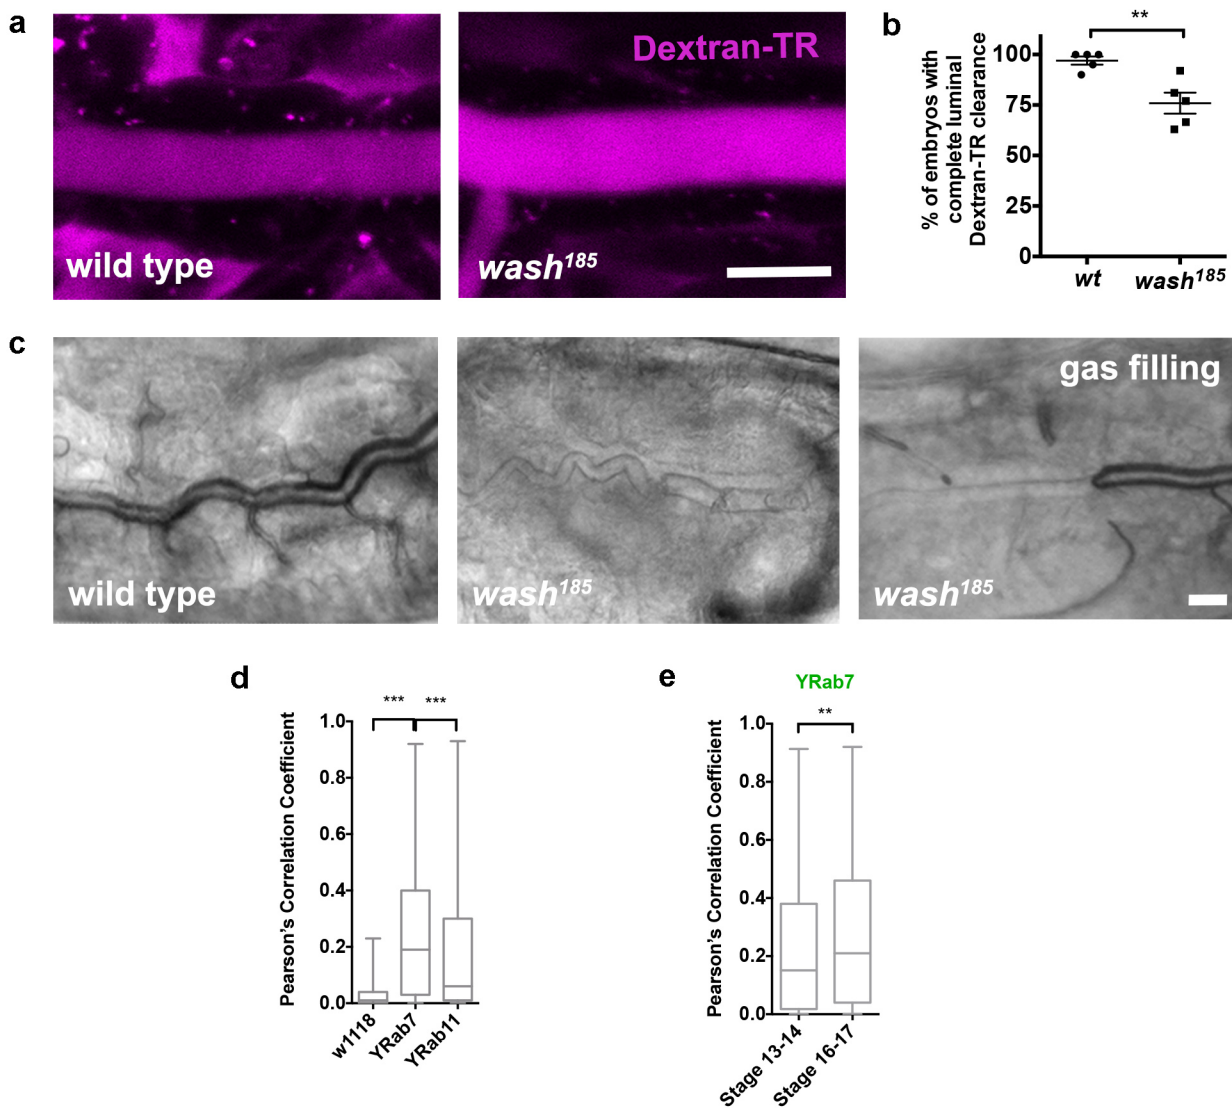

**Supplementary Figure 5. WASH is required for luminal endocytosis and gas filling in *Drosophila* airways.**

(a) Confocal frames of the tracheal DT of wild-type and *wash*<sup>185</sup> embryos (18.5 hours AEL) subjected to Dextran-TR endocytic assay. Note that intracellular Dextran-TR puncta are reduced in *wash*<sup>185</sup> mutant embryos.

(b) Scatter plots depicting the percentage of embryos (%) with luminal Dextran-TR clearance completion in wild type ( $n = 12$ ) and *wash*<sup>185</sup> ( $n = 18$ ) embryos. \*\*,  $P < 0.005$ . (c) Wide-field images of living stage 17 wild-type and *wash*<sup>185</sup> embryos (21.5 h AEL). *wash*<sup>185</sup> mutants showed partial or no gas-filling.

(d) Pearson's correlation coefficient  $r$  of intracellular WASH puncta and GFP signals in airways of w1118 ( $n = 166$  WASH puncta,  $n = 3$  embryos) (as control of GFP antibody) or YRab7 ( $n = 359$  WASH puncta,  $n = 5$  embryos) or YRab11 ( $n = 356$  WASH puncta,  $n = 5$  embryos). \*\*\*,  $P < 0.001$  (unpaired two tailed  $t$ -tests). *ns*, not significant ( $P > 0.05$ ). (e)

Pearson's correlation coefficient  $r$  of intracellular WASH puncta and GFP signals in airways of embryos expressing YRab7 during stage 13-14 ( $n = 244$  WASH puncta,  $n = 5$  embryos) and late16-17 stages ( $n = 355$  WASH puncta,  $n = 5$  embryos). \*\*,  $P < 0.01$  (unpaired two tailed  $t$ -tests). The boxplots (d, e) show the median (horizontal line) and the data range from 25th to 75th percentile. Bars present maxima and minima values. Scale bars, 10  $\mu\text{m}$ .



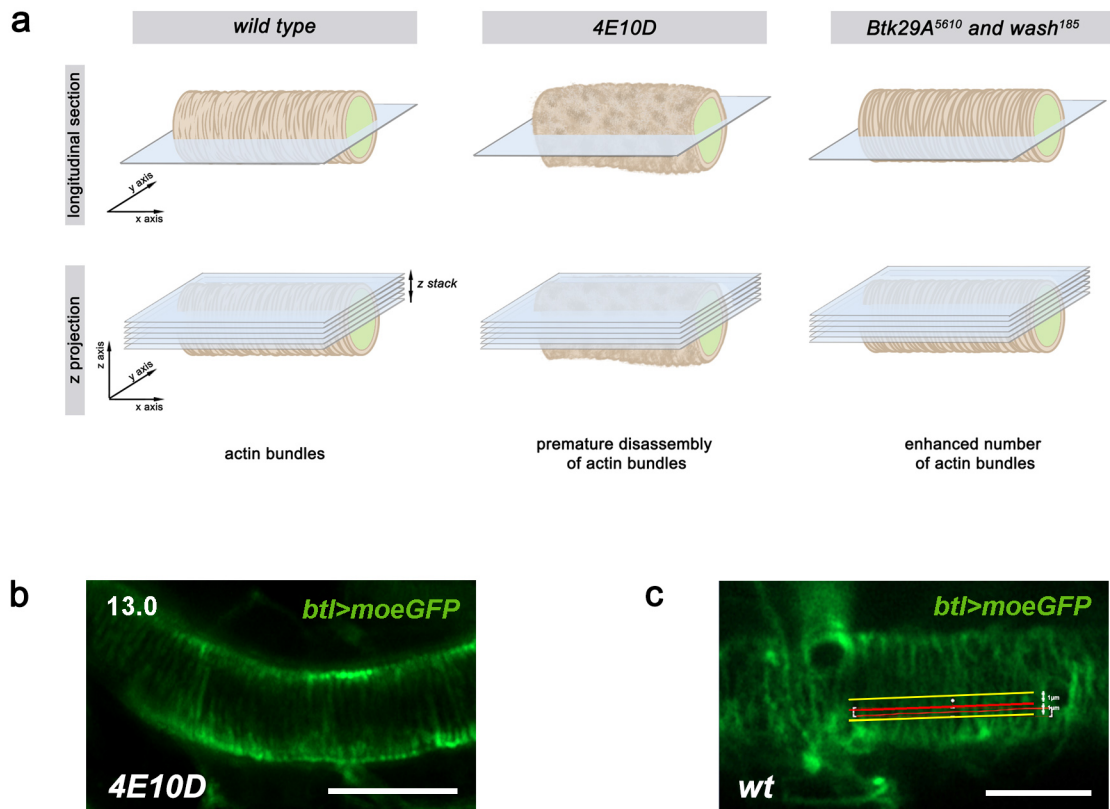

**Supplementary Figure 6. Apical actin bundles in *Ptp4EPtp10D*, *Btk29A<sup>5610</sup>* and *wash<sup>185</sup>*.**

(a) Schematic overview of the actin bundles phenotypes depicted in Fig. 5. Wild type, *Btk29A<sup>5610</sup>* and *wash<sup>185</sup>* embryos were examined 18 hours AEL (just before luminal clearance) and *Ptp4EPtp10D* 17 hours AEL (just before the premature luminal clearance), using airyscan super-resolution confocal microscopy. Single sections (upper row) were used for the visualization of the apical actin and Z-stack maximum projections (lower row) for the visualization of the actin bundles. Note that the actin bundles observed in wild-type, *Btk29A<sup>5610</sup>* and *wash<sup>185</sup>* embryos are dissociated in *Ptp4EPtp10D* much earlier, concurrently to the premature luminal clearance.

(b) Z-projection showing the DT of a *Ptp4EPtp10D* embryo expressing *btl>moe-GFP* (green) 13 hours AEL. The apical actin bundles are intact at this stage in *Ptp4EPtp10D* embryos.

(c) Z-projection of a wild-type embryo expressing *btl>moe-GFP* (green) 18 h AEL. Three horizontal lines along the tube axis, 1  $\mu$ m apart, were drawn. Actin bundles  $\geq 2 \mu$ m long were quantified. Scale bar 10  $\mu$ m.

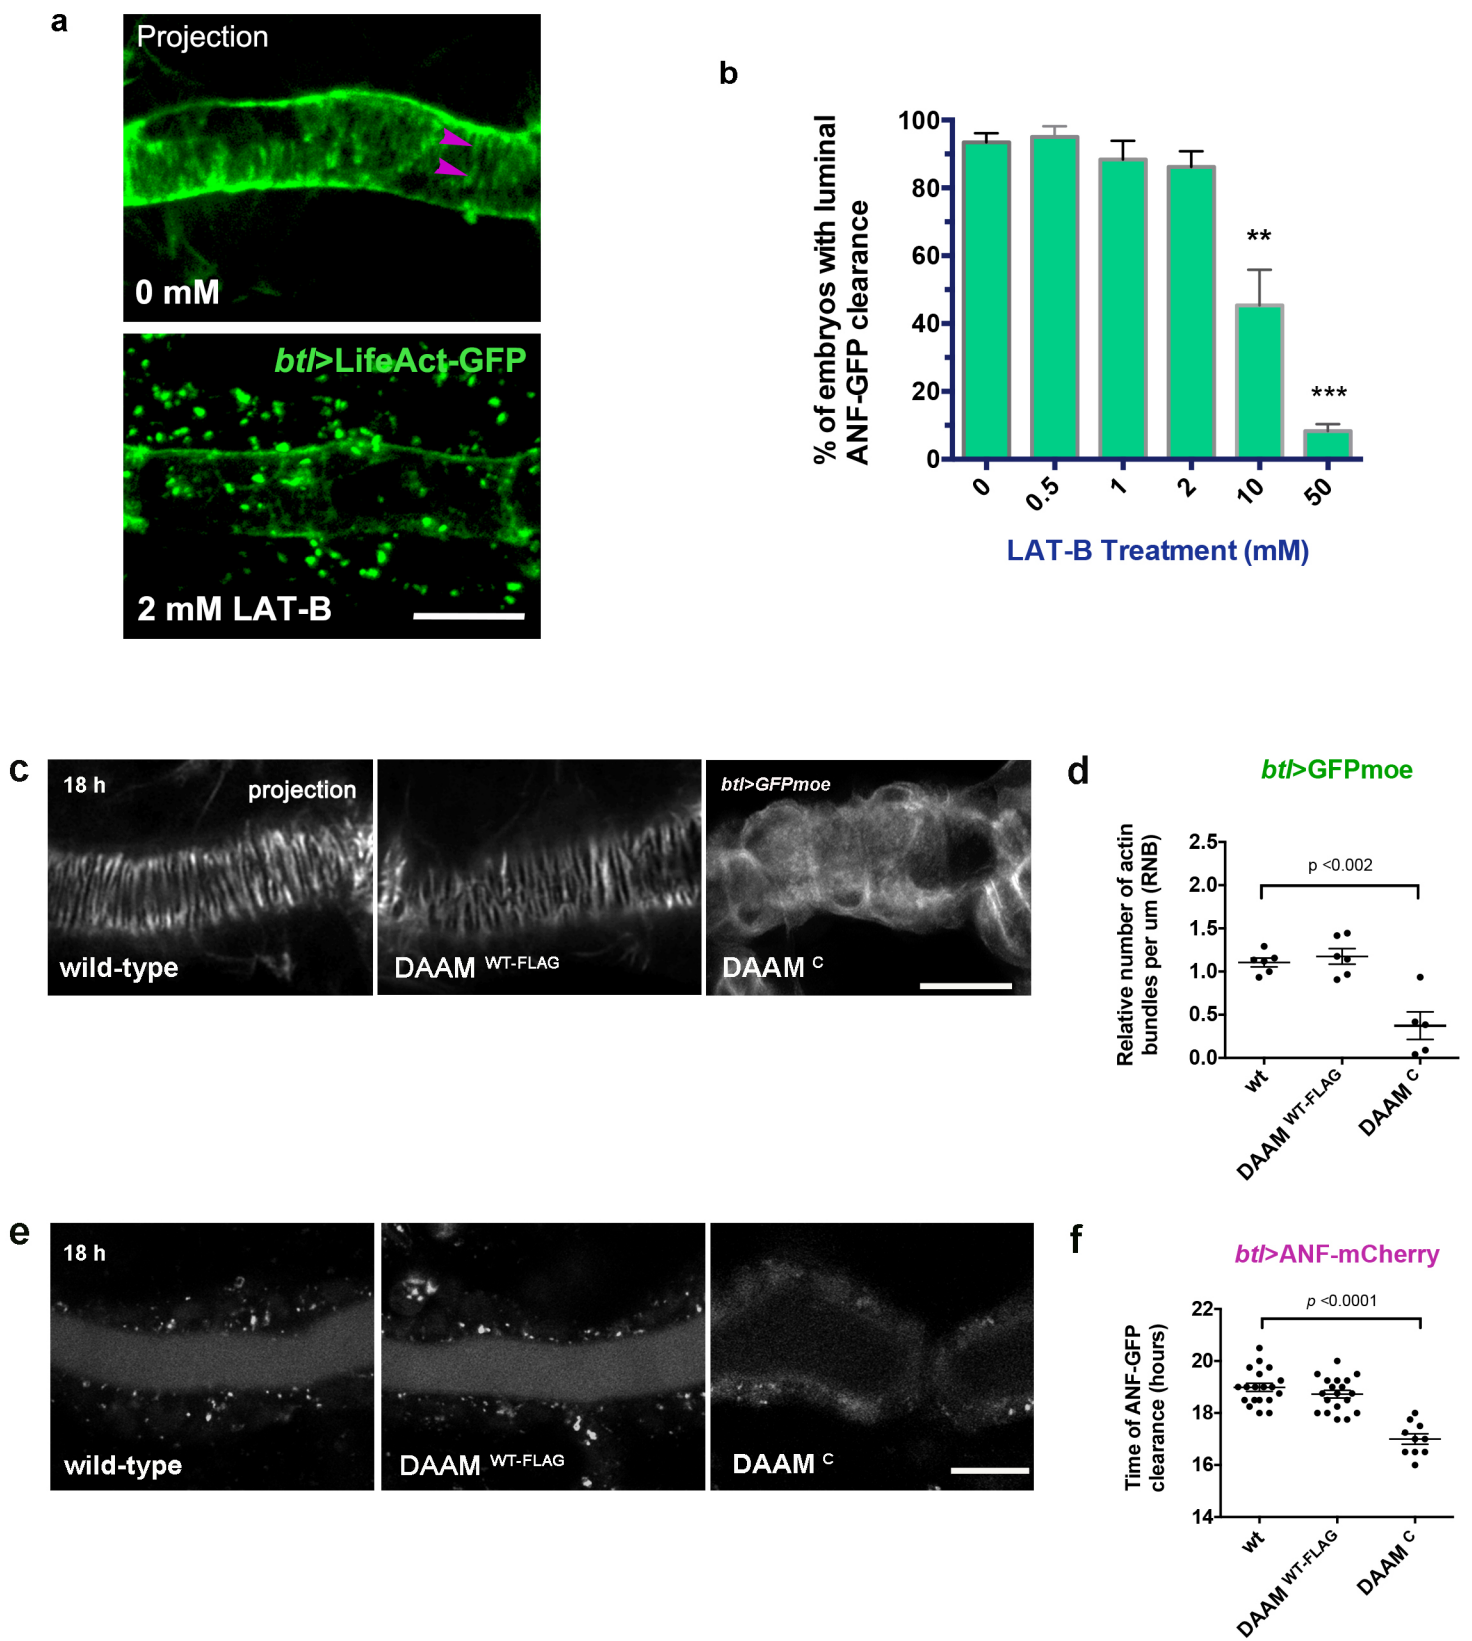

Figure S7

**Supplementary Figure 7. Chemical disruption of the actin bundles affects tube clearance in a dose dependent manner.**

- (a) Confocal projections of the DT in wild-type embryos expressing *btl>LifeAct-GFP* showing actin bundles before (upper image) and after treatment with 2 mM Latrunculin-B (LAT-B) (lower image). LAT-B treatment induces actin bundle losses, coupled with an increase of actin patches. Representative images from 3 independent experiments are shown.
- (b) Plots showing the percentage of wild-type embryos treated with different concentrations of LAT-B (total  $n = 148$ ) that complete luminal ANF-GFP clearance. Note that high concentrations of LAT-B block luminal ANF-GFP clearance. \*\*,  $P < 0.002$ ; \*\*\*,  $P < 0.0001$  (unpaired two tailed  $t$ -tests).
- (c) Confocal projections of the DT of wild-type, *btl>DAAM<sup>WT-FLAG</sup>*, and *btl>DAAM<sup>C</sup>* embryos expressing the actin reporter *btl>moeGFP* (grey). Images were acquired, 18h AEL. Actin bundles in *btl>DAAM<sup>C</sup>* were disrupted.
- (d) Plots showing the relative number of actin bundles ( $> 2 \mu\text{m}$  long) per  $\mu\text{m}$  (RNB) in wild-type ( $n = 6$ ), *DAAM<sup>WT-FLAG</sup>* ( $n = 6$ ), and *DAAM<sup>C</sup>* ( $n = 5$ ) embryos expressing *btl>moeGFP*. \*\*,  $P < 0.002$  (unpaired two tailed  $t$ -tests).
- (e) Confocal frames showing the DT of living wild-type, *btl>DAAM<sup>WT-FLAG</sup>*, and *btl>DAAM<sup>C</sup>* embryos expressing *btl>ANF-mCherry* (grey). Luminal ANF-mCherry is prematurely cleared in *btl>DAAM<sup>C</sup>* embryos.
- (f) Plots showing the average time (hours) of luminal ANF-GFP clearance of wild-type ( $n = 19$ ), *btl>DAAM<sup>WT-FLAG</sup>* ( $n = 19$ ), and *btl>DAAM<sup>C</sup>* ( $n = 10$ ) embryos. \*\*,  $P < 0.0001$  (unpaired two tailed  $t$ -tests).

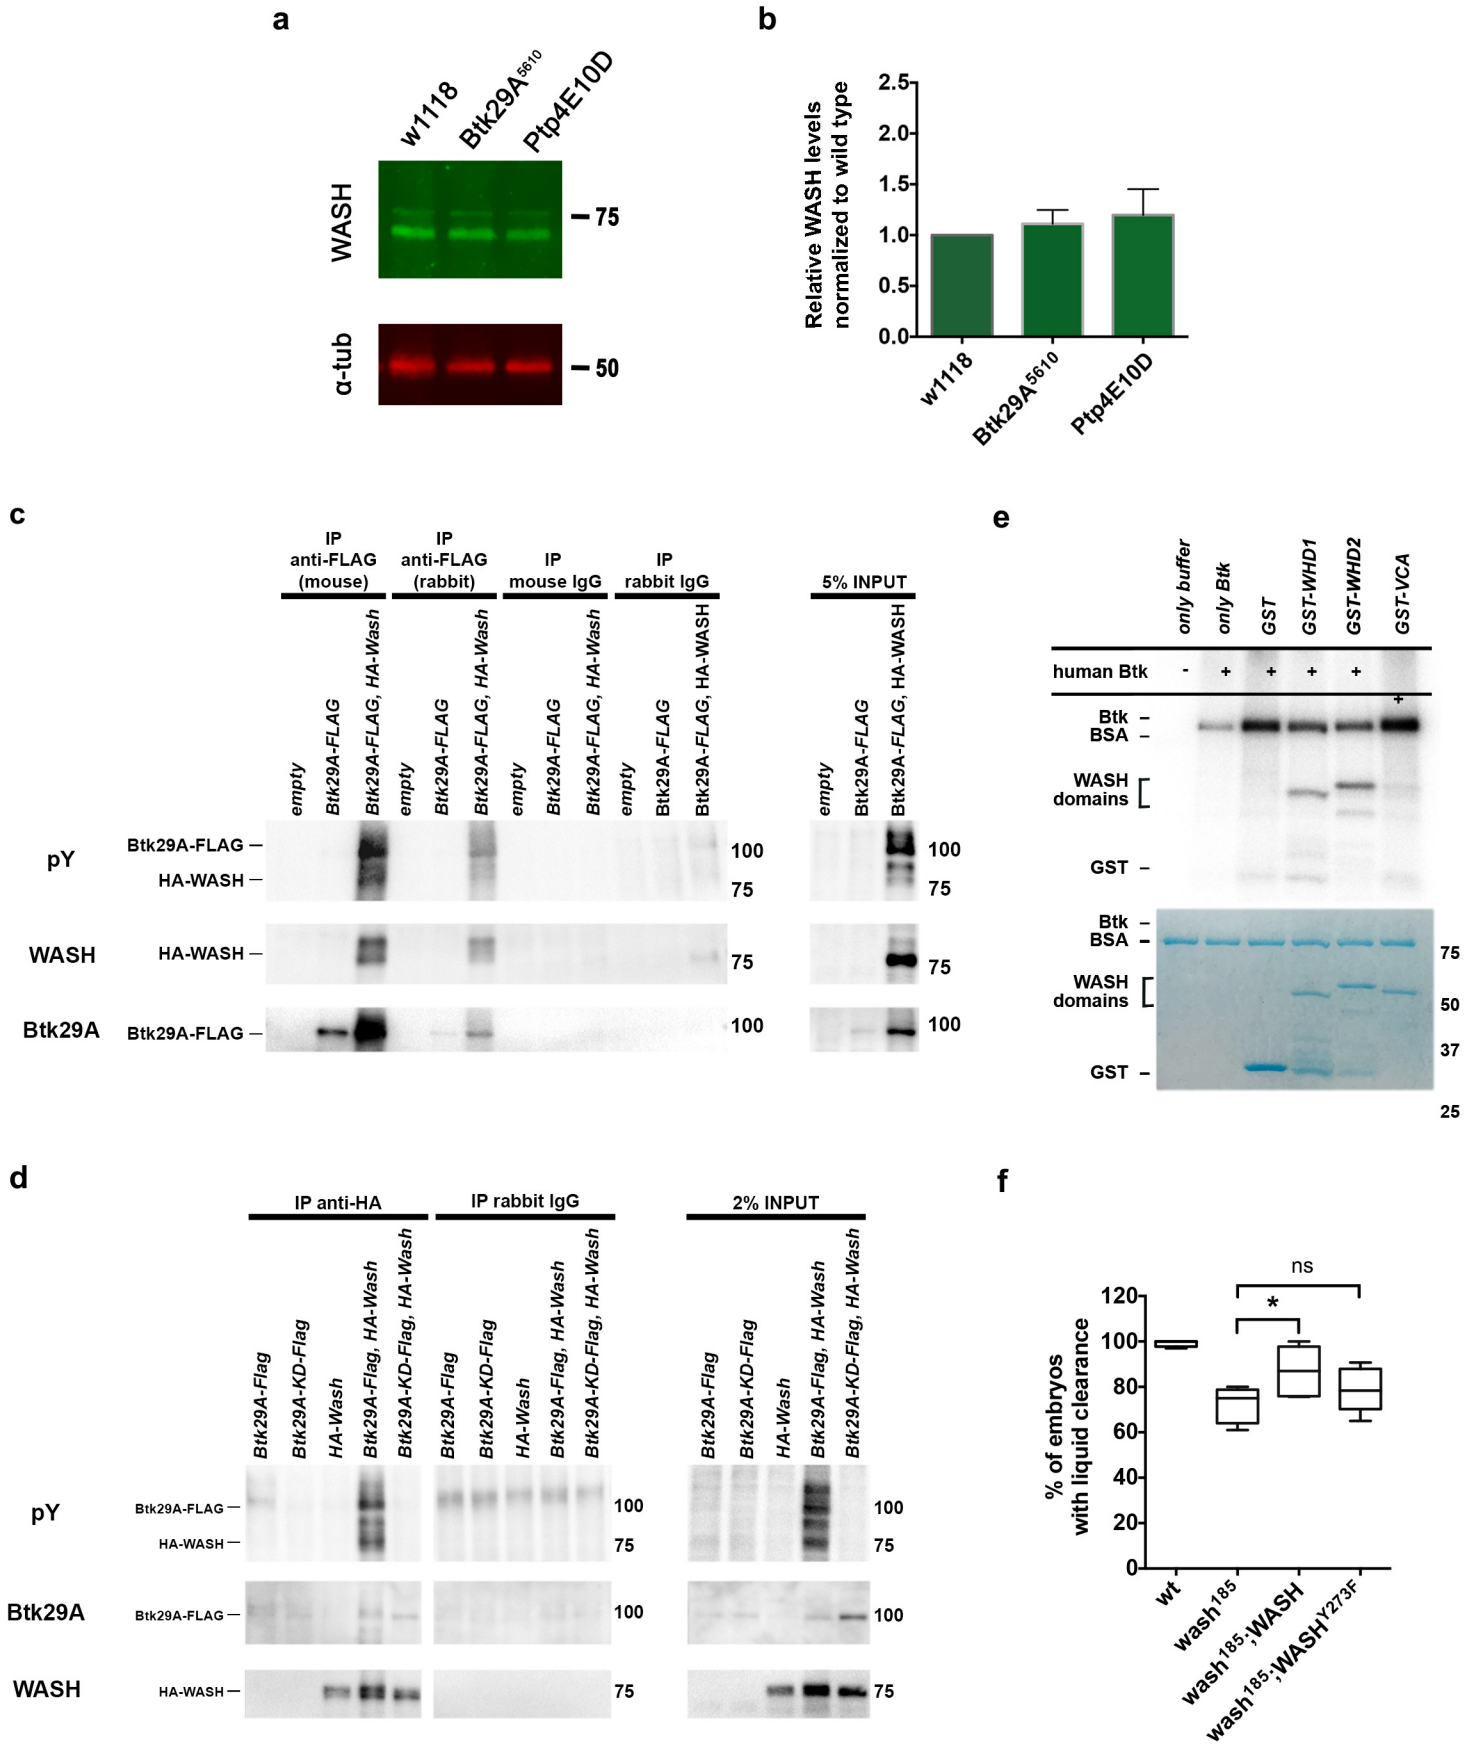

Figure S8

**Supplementary Figure 8. WASH can be phosphorylated and is a conserved substrate of Btk29A.**

(a) Western blot analysis showing the expression levels of WASH in lysates of wild type, *Ptp4Etp10D* and *Btk29A<sup>5610</sup>* embryos.

(b) Plots depicting the relative WASH/ $\alpha$ -tubulin signals shown in (a), normalized to wild type. The western blot signal quantification derived from 3 independent experiments.

(c) Co-immunoprecipitates of FLAG tagged Btk29A protein from lysates of transfected S2 cells (using two different anti-FLAG antibodies and mouse or rabbit IgG as control), blotted with anti-pY, anti-WASH and anti-Btk29A. The cells were transfected with pAWF-*Btk29A* and pAHW-*wash* vectors as indicated. Btk29A-FLAG interacts with HA-WASH and phosphorylation of both proteins was observed (75 and 100kDa for HA-WASH and Btk29A-FLAG respectively). The same result was acquired in two independent repetitions of the experiment.

(d) Co-immunoprecipitates of WASH from lysates of transfected S2 cells (using anti-HA antibody or rabbit IgG as a control), blotted with anti-pY, anti-Btk29A and anti-WASH. S2 cells were transfected with pAWF vector containing *Btk29A* or *Btk29A<sup>KD</sup>* and pAHW containing *Wash* cDNA or combinations of the above (as indicated). HA-WASH interacts with both Btk29A-FLAG and Btk29AKD-FLAG. A strong 75kDa pY signal is detected only when HA-WASH and Btk29A-FLAG are co-expressed suggesting that Btk29A is sufficient to phosphorylate WASH protein. The same results were acquired in three independent repetitions of the experiment.

(e) *In vitro* phosphorylation assay of the human WASH domains (WHD1, WHD2 and VCA) using 100ng of human Btk kinase. The  $\gamma$ -<sup>32</sup>P signal was detected with autoradiography (upper panel) and the respective protein amounts were estimated by Coomassie blue staining (lower panel).

(f) Plots depicting the percentage of wild-type ( $n = 21$ ), *wash<sup>185</sup>* ( $n = 27$ ), *wash<sup>185</sup>;btl> Wash* ( $n = 31$ ) and *wash<sup>185</sup>;btl> Wash<sup>Y273F</sup>* ( $n = 39$ ) embryos that complete gas-filling. *wash<sup>185</sup>* embryos expressing the *Wash* but not the non-phosphorylatable variant *Wash<sup>Y273F</sup>*, restored the gas-filling defects of *wash<sup>185</sup>* mutants. \*,  $P < 0.03$  (unpaired two tailed *t*-tests).

**a**

```

humanWASP      ----MSGGPMGRPGG-----RGAPAVQNIIPSTLQDHEHQRLFEMLGRKCLTLATAVQVLYLALPGAETHWTKHCGAVCFVNDPKSYFIRLYGLQAGRLLWEQELYSQLVYS TPT---PFFHTFAGDDCCAGLNFADEDE----AQAFRALVQEKIQKR--NQRQSGDRRO 158
fruitflyWASH   ----MEESPYLHSFYQVAIIATDLHEDTIIQAQOSLDCLEKRTINSIFERIDARLARNGSKVEIDN-----NRVNR-----AQAKIDALVGSKRAI-----QIFAPARFPASDVLAPLPAITFPQVAA--NPLMEQQVDQLPQGTYSSSHADQKPD-DADIFFHVRGREQ 149
humanWASH1     HTPVVKQCSLAGQLYAVPLIQPDLRREBAIQVADALQYLQNSIGDIFSRISRRVLSRRQLQAIG-----ERVSL-----AQAKIEKIGSKRAI-----RVFSSAKYPAPGRLQEQGIFGTGQD--PGLQRFRHRI---QSKRPLDERALQELKDFPVCVTKFP 150
mouseWASH1     WTPVVKQCSLAGQLYAVPLIQPDLRREBAIQVADALQYLQNSIGDIFSRISRRVLSRRQLQAIG-----ERVSL-----AQAKIEKIGSKRAI-----RVFSSAKYPAPGRLQEQGIFGTGQD--PGLQRFRHRI---QSKRPLDERALQELKDFPVCVTKFP 150

humanWASP      LPP----PPTPANEERRGGLPPLPHFGDQGGPPVPLSLGLATVDIQNPDISSRYRGLPAPGPPSPADK-----RSGKKKISKADIGA-----PSGFKHVSHVGVDPQNGFDVNNLDPDLRSLFSRAGISEAQLTDAETSKLIDFIEDQGGLEAVRQEMRRQEP 314
fruitflyWASH   ESPLVAERKINRRTAGLGILP-----AGVRSVPSLMRFNTEFAYGEDLNAMKRSRPPQARRVASQSTQ--LTGEKQLAPAPSHAGHTTKLATPAGDLRYNPAALAAP--AIDVPLDLPLDPLGI-----ANDLQVEPVEEQ-----TPI- 282
humanWASH1     --EPEDAEEGLGLP-----S-NISSVSLLENTTENLYKYVFL-----DPLA-GAVTKTHVMGAEETEELFDAPLSISKREOLEQQVPEYFYVPLDQVFP--EIHVFSYLPDPLGI-----ANDLMSADLG-----PG- 269
mouseWASH1     --EPEDAEEGLGLP-----S-NISSVSLLENTTENLYKYVFL-----DPLA-GAVTKTHVMGAEETEELFDAPLSISKREOLEQQVPEYFYVPLDQVFP--EIHVFSYLPDPLGI-----ANDLMSADLG-----PG- 268

humanWASP      PPPPPSRGGNQLRPPPIVGG-----NKGSRGSLPPVPLGIAPPPPTPRGPPFP GRGGPPPPPPATGRSGPLPPPPGAGGPPMPPPPPPPSSGNGPAPPLPALVPA GGLAPGGGRGALLDQIRQGIQLNKTPGA-PSSALQPPPQ-----SSEGLVGALM--- 471
fruitflyWASH   --APSQF--GDLPELPLDLGLEEQDIIVQALAAQTHIPGVRRKSVGQCPSPVTAAPPPFP PPPPPPPPPPAQTSIAPSPFPPTKGAVKP-----LSPS--LATPLNMQPPP--ATEDPRSELMAIRNAGVHGRLRSPAAPLDVVDNSR--SKAGGAVTGDLMADLH 441
humanWASH1     --IAPSAP--GTLPELPTFHTTEVAEPLKVD-----LQDGLVTTPPPP-----PPPPPAPEVLAS--APLPPSTAAPVQOGAR-QD-----DSSSS--ASPSVOGAPR EVVDPSSGGWATLLESIRQAGGIGAKLRSMKERKLEKQKQEQVRATSQGGHLMSDLF 413
mouseWASH1     --IAPSAP--GALPELPAFHTTEVAEPLQPE-----LENEVLLAAPPFP PPPPPPPAPALTVPQPPMPFDNATAAGQVAR-EE-----DSSSS--MAHTASVOGAPK EVVDPSSGRATLLESIRQAGGIGAKLRSMKERKLEKQKQEQVRATSQGGHLMSDLF 421

humanWASP      HVMQKRSRAIHSSDE-----G--EDQAGDEDEDEWDD 502
fruitflyWASH   NKLMRRKIGSGQNFEATAGN-PLMQQLSRVIPPVQPKRKSSEHSEDEDDGWN- 499
humanWASH1     NKLMRRKIGSGKPGA--GEGPGGAFVRVSDSIPPLPPQQ-----PQAEDEDDWES 465
mouseWASH1     NKLMRRKIGSGKPGTGTSEGGPGGAFSRMSDSIPPLPPQQ-----PAGDEDEDDWES 475

```

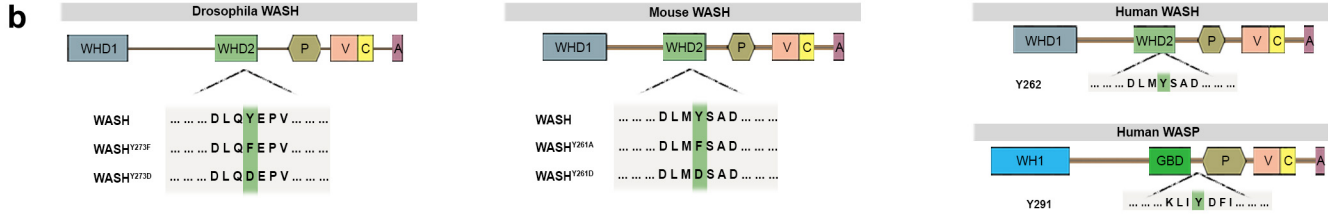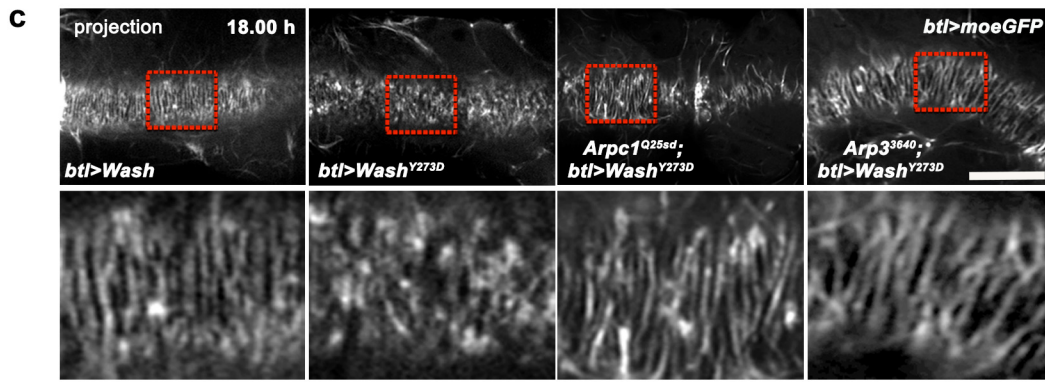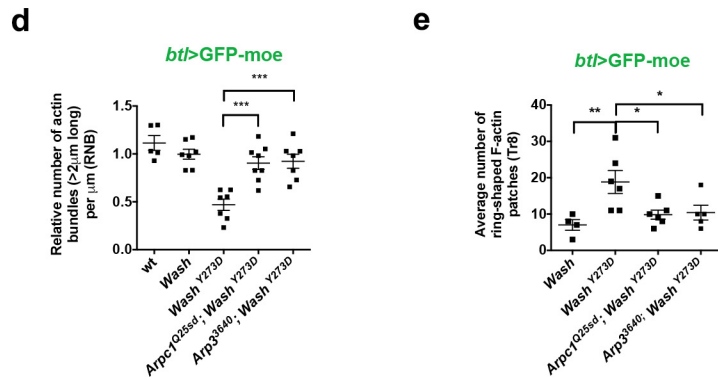

Figure S9

### Supplementary Figure 9. The Y<sup>273</sup> residue of WASH.

(a) Comparative protein sequence alignment of human Wasp, human WASH, mouse WASH and *Drosophila* WASH. The Wasp tyrosine residue 291 (Y<sup>291</sup>), known as a substrate of Src kinases, is conserved in *Drosophila*, human and mouse WASH protein (Y<sup>273</sup>, Y<sup>262</sup> and Y<sup>261</sup> respectively) (green box).

(b) Schematic representation of *Drosophila* WASH, mouse WASH, human WASH and human Wasp proteins. The single amino acid substitutions of WASH tyrosine residue Y273 to Y273F or Y273D and the corresponding Y261 of mouse WASH, Y262 of human WASH, and Y291 of human Wasp are indicated (in green). WH1: Wasp homology region 1; GBD/CRIB: GTPase binding/Cdc42 and Rac interactive binding domain; WHD1: WASH homology domain 1; WHD2: WASH homology domain 2; P: proline-rich domain; V: Verprolin homologous domain; C: connecting or central domain; A: acidic domain. V, C and A together are referred to as the VCA domain.

(c) Airyscan confocal images of the DT of wild-type, *btl>Wash* or *btl>Wash<sup>Y273D</sup>*, *Arpc1<sup>Q25sd</sup>*; *btl>Wash<sup>Y273D</sup>* and *Arp3<sup>3640</sup>*; *btl>Wash<sup>Y273D</sup>* embryos expressing the actin cytoskeleton reporter *moe-GFP* (grey). Images were acquired during luminal endocytosis, 18 h AEL. Z-stack projections are shown. Lower row depicts zoomed view of areas indicated by the rectangular frames (red). Scale bars, 10µm.

(d) Scatter plots showing the relative number of actin bundles (> 2 µm long) per µm (RNB) in wild-type (*n* = 5), *btl>Wash* (*n* = 7) or *btl>Wash<sup>Y273D</sup>* (*n* = 7), *Arpc1<sup>Q25sd</sup>*; *btl>Wash<sup>Y273D</sup>* (*n* = 8) and *Arp3<sup>3640</sup>*; *btl>Wash<sup>Y273D</sup>* (*n* = 7) embryos expressing *btl>moeGFP*. \*\*\* indicate statistical significance *P* < 0.0005 respectively, in comparison to wild-type (unpaired two tailed *t*-tests).

(e) Scatter plots showing the average number of ring-shaped actin patches in *btl>Wash* (*n* = 4) or *btl>Wash<sup>Y273D</sup>* (*n* = 6) or *Arpc1<sup>Q25sd</sup>*; *btl>Wash<sup>Y273D</sup>* (*n* = 6) or *Arp3<sup>3640</sup>*; *btl>Wash<sup>Y273D</sup>* (*n* = 5) embryos. \*\*, *P* < 0.01, \**P* < 0.03 (unpaired two tailed *t*-tests).

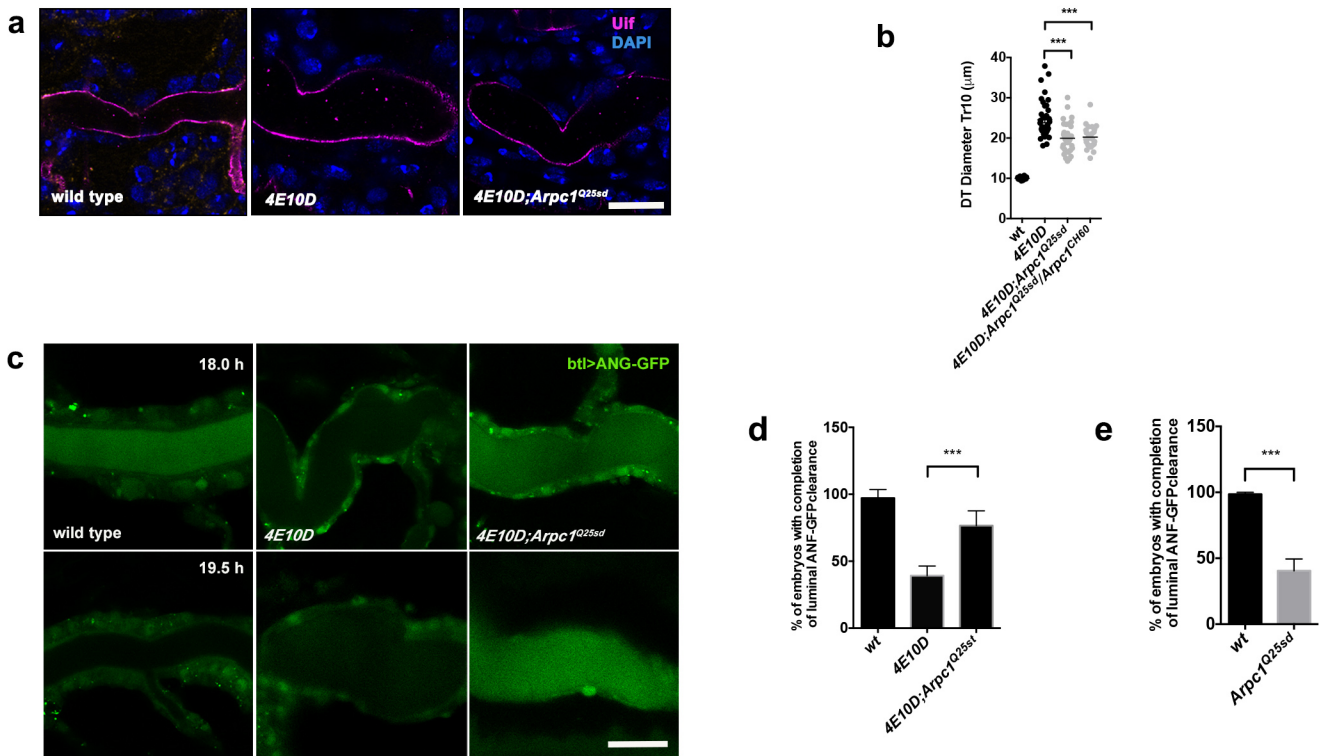

### Supplementary Figure 10. *Arpc1* mutations suppress *Ptp4EPtp10D* phenotypes.

(a) Confocal images of the tracheal DT of wild-type, *Ptp4EPtp10D* and *Ptp4EPtp10D; Arpc1<sup>Q25sd</sup>* mutant embryos (stage 17) stained for the apical marker Uif (magenta) and DAPI (blue). The reduction of *Arpc1* in *Ptp4EPtp10D* mutants suppressed the tube shape defects. (b) Plots depicting the average diameter of the DT (Tr8) in wild-type ( $n = 10$ ), *Ptp4EPtp10D* ( $n = 39$ ), *Ptp4EPtp10D; Arpc1<sup>Q25sd</sup>* ( $n = 35$ ) and *Ptp4EPtp10D; Arpc1<sup>Q25sd</sup>/Arpc1<sup>CH60</sup>* ( $n = 24$ ) embryos. The DT diameter phenotype of *Ptp4EPtp10D* is significantly suppressed in *Ptp4EPtp10D; Arpc1<sup>Q25sd</sup>* or in *Ptp4EPtp10D; Arpc1<sup>Q25sd</sup>/Arpc1<sup>CH60</sup>* mutants. Unpaired two-tailed *t*-test. \*\*\*,  $P < 0.001$ . (c) Confocal frames showing the DT of living wild-type, *Ptp4EPtp10D* and *Ptp4EPtp10D; Arpc1<sup>Q25sd</sup>* mutant embryos expressing *btl>ANF-GFP* (green), 18 h AEL (before luminal clearance) and 19.5 h AEL (after the luminal clearance). *Ptp4EPtp10D* clear earlier ANF-GFP (18h), while *Ptp4EPtp10D; Arpc1<sup>Q25sd</sup>* mutant embryos retain luminal ANF-GFP at 19.5 h (lower row). Time points represent hours AEL. (d) Bar graph showing the percentage of wild-type ( $n = 27$ ), *Ptp4EPtp10D* ( $n = 38$ ) and *Ptp4EPtp10D; Arpc1<sup>Q25sd</sup>* ( $n = 36$ ) embryos expressing *btl>ANF-GFP*, that completed luminal protein clearance at 18 h AEL. \*\*\*,  $P < 0.0005$ . Plots show mean values and s.e.m of five independent experiments. Unpaired two-tailed *t*-test. (e) Bar graph showing the percentage of wild-type ( $n = 26$ ) and *Arpc1<sup>Q25sd</sup>* ( $n = 44$ ) embryos that completed luminal ANF-GFP protein clearance. Plots show mean values and s.e.m of five experiments. \*\*\*,  $P < 0.0005$ . Unpaired two-tailed *t*-test.



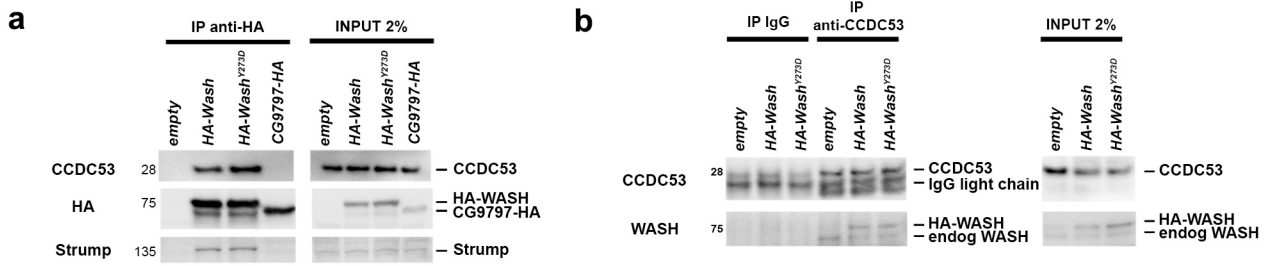

**Supplementary Figure 11. Wash<sup>Y273D</sup> mutation does not disrupt the interactions of WASH with its regulatory complex.**

(a) Co-immunoprecipitates of HA-tagged WASH protein from lysates of transfected S2 cells (using anti-HA affinity matrix), blotted with anti-CCDC53, anti-HA and anti-Strumpellin. The cells were transfected with pAHW containing *Wash* or *Wash<sup>Y273D</sup>*, or pAHW containing *CG9797* (as a negative control) cDNA, as indicated.

(b) Co-immunoprecipitates of endogenously expressed CCDC53 protein from lysates of transfected S2 cells, blotted with anti-CCDC53 and anti-WASH. The cells were transfected with pAHW containing *Wash* or *Wash<sup>Y273D</sup>* cDNA, as indicated.

**Figure 7a**

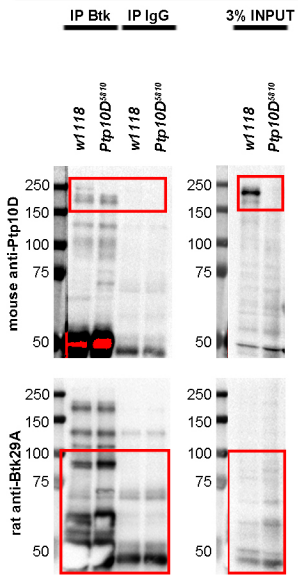

**Figure 7b**

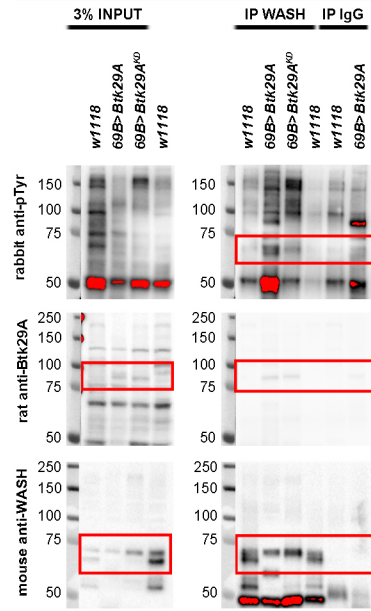

**Figure 7d**

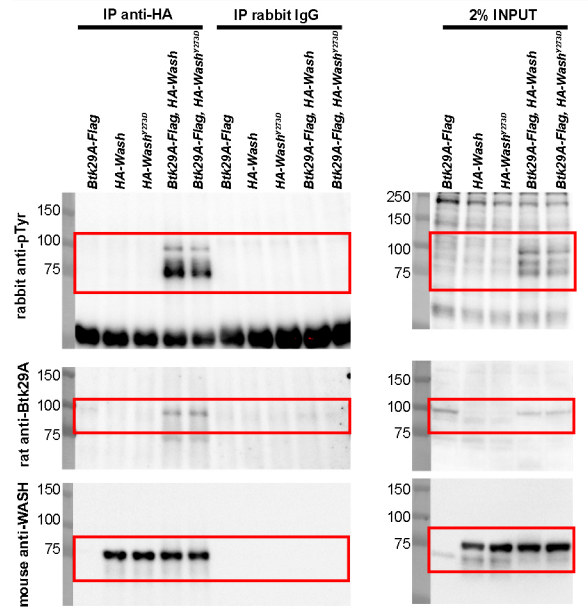

**Figure S3h**

**Figure S3k**

**Figure S3m**

**Figure S8a**

**Figure S8c**

**Figure S8e**

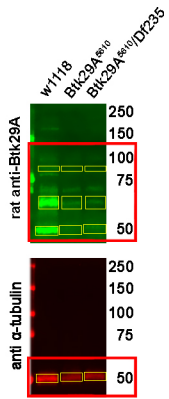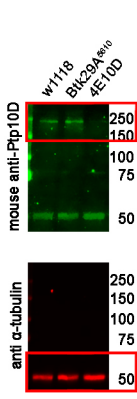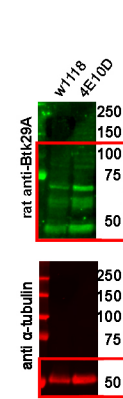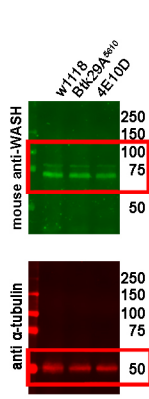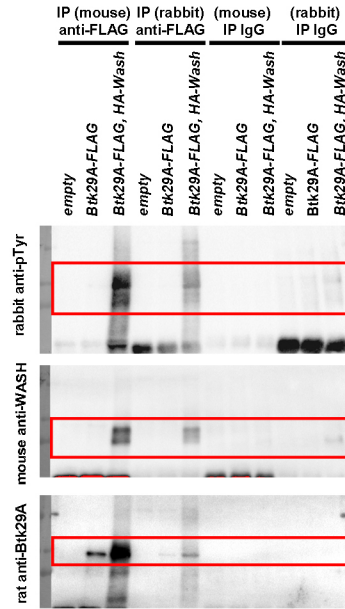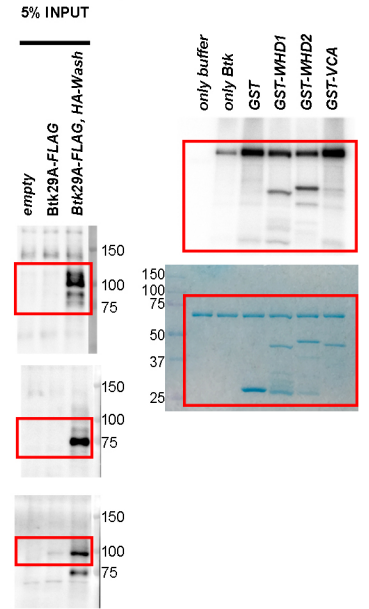

**Figure S8d**

**Figure S11a**

**Figure S11b**

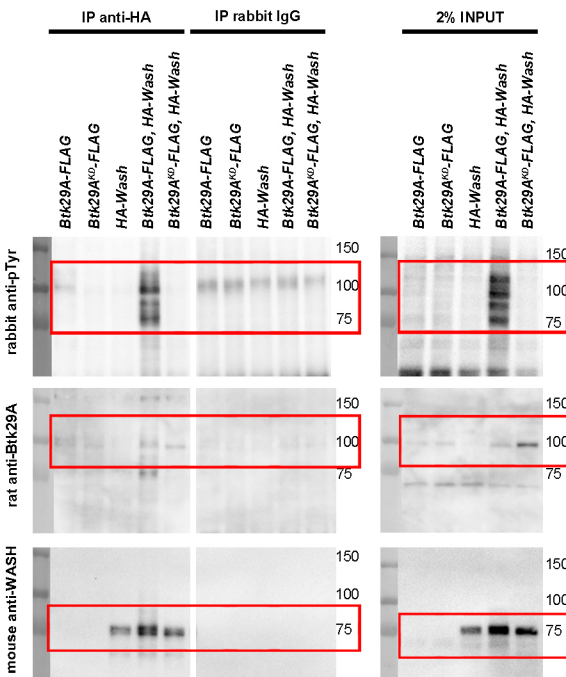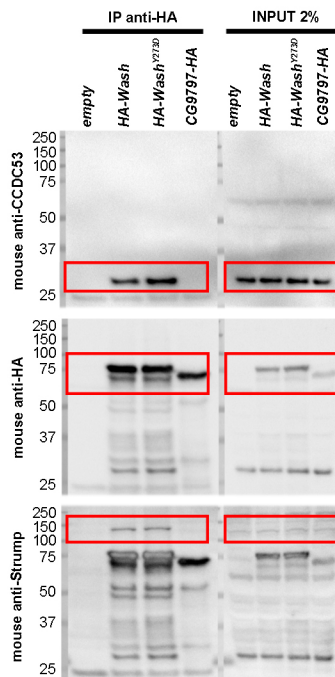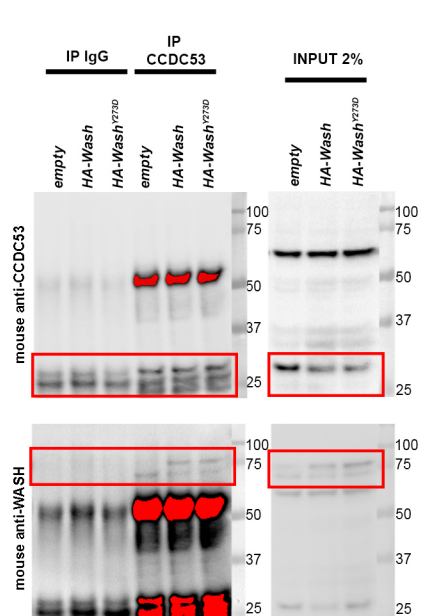

**Supplementary Figure 12. Unprocessed Western blots.**

Unprocessed original blots used in the main and supplementary figures. Red boxes indicate the region presented in the figures. The corresponding figure is indicated on the top of each plot. The yellow frames in figure S3h indicate the blot regions used to quantify intensities.

**Supplementary Table 1. Genetic interaction between *Ptp4E10D* and mutants of other RTK or TK components.**

|                                | <b>Genotype</b>                                             | <b>Tube diameter (μm)<sup>a</sup></b> | <b>Statistical significance</b> | <b><i>n</i></b> |
|--------------------------------|-------------------------------------------------------------|---------------------------------------|---------------------------------|-----------------|
|                                |                                                             | <i>mean</i>                           |                                 |                 |
| <b>Receptor</b>                | <i>w<sup>1118</sup></i> (wild type)                         | 9.49                                  | -                               | 52              |
| <b>Tyrosine kinases (RTKs)</b> | <i>4E<sup>1</sup>10D<sup>1</sup></i>                        | 19.5                                  | *** b                           | 72              |
|                                | <i>4E10D; btl&gt;EGFR<sup>DN</sup></i>                      | 19.6                                  | ns                              | 52              |
|                                | <i>4E10D; btl&gt;EGFR<sup>E1</sup></i>                      | 20.8                                  | ns                              | 24              |
|                                | <i>4E10D; EGFR<sup>k05115/+</sup></i>                       | 20.5                                  | ns                              | 53              |
|                                | <i>4E10D; btl&gt;FGFR<sup>ΔTOP</sup></i>                    | 18.9                                  | ns                              | 38              |
|                                | <i>4E10D; stitcher<sup>Excel9056</sup></i>                  | 20.1                                  | ns                              | 28              |
|                                | <i>4E10D; btl&gt;stitcher<sup>KD</sup></i>                  | 18.9                                  | ns                              | 42              |
|                                | <i>4E10D; btl&gt;stitcher<sup>CA</sup></i>                  | 20.87                                 | ns                              | 51              |
|                                | <i>4E10D; pvr<sup>c02195</sup></i>                          | 20.27                                 | ns                              | 22              |
|                                | <i>4E10D; pvr<sup>c02859</sup></i>                          | 19.15                                 | ns                              | 25              |
|                                |                                                             |                                       |                                 |                 |
| <b>Tyrosine Kinases (TKs)</b>  | <i>4E10D; Src42A<sup>E1</sup></i>                           | 18.8                                  | ns                              | 57              |
|                                | <i>4E10D; Src42A<sup>DN</sup></i>                           | 17.1                                  | ns                              | 59              |
|                                | <i>4E10D; Src64B</i>                                        | 19.5                                  | ns                              | 48              |
|                                | <i>4E10D; Src42A<sup>CA</sup></i>                           | 20.6                                  | ns                              | 39              |
|                                | <i>4E10D; Btk29A<sup>5610</sup></i>                         | 11.8                                  | *** c                           | 27              |
|                                | <i>4E10D; Src42A<sup>E1</sup><br/>Btk29A<sup>5610</sup></i> | 12.5                                  | *** c                           | 64              |
|                                |                                                             |                                       |                                 |                 |

<sup>a</sup> The diameter of DT (Tr8) measured in live embryos at late stage 17 using phase-contrast microscopy. Diameter values represent averages of at least 3 independent experiments.

For details about the transgenic strains or the origin of the mutant alleles, see methods.

*n* = number of embryos examined per genotype.

<sup>b</sup> \*\*\*, *P* < 0.001 in comparison to wt embryos.

<sup>c</sup> \*\*\*, *P* < 0.001 in comparison to *Ptp4E10D* embryos, unpaired two-tailed Student's *t*-test.

*ns*, *P* > 0.05 in comparison to *Ptp4E10D* embryos, unpaired two-tailed Student's *t*-test

**Supplementary Table S2. The sequences of primers used for cloning.**

| <b>Primers used for:</b>                | <b>Primer name</b> | <b>Primer sequences (5'-3')</b>               |
|-----------------------------------------|--------------------|-----------------------------------------------|
| generating K554M mutation in Btk29A     | Mutbtk p1          | CTATCGACACAGCGGTCATGATGATGAAGGAAGGAACC        |
|                                         | Mutbtk p2          | GGTTCCTTCCTTCATCATCATGACCGCTGTGTCGATAG        |
| generating Y273D mutation in Wash       | washY273D p1       | GCATAGCGAATGATCTGCAAGACGAGCCAGTGGAGGAGCAAAC   |
|                                         | washY273D p2       | GTTTGCTCCTCCACTGGCTCGTCTTGCAGATCATTGCTATG     |
| generating Y273F mutation in Wash       | washY273F p1       | CATAGCGAATGATCTGCAATTCGAGCCAGTGGAGGAGCAAAC    |
|                                         | washY273F p2       | GTTTGCTCCTCCACTGGCTCGAATTGCAGATCATTGCTATG     |
| subcloning Btk29A into pJFRC28 vector   | Btk primer1        | GCTAATGCGGCCGCTTTAGTTTCGTATTAAATCGTTACTATTTAA |
|                                         | Btk primer 2       | GCTATTGGTACCCCTCCACCTCCGTCGGTTAGCGTTTGGGCAC   |
| subcloning Ptp10D into pJFRC-MUH vector | Ptp primer1        | GCTAATGCGGCCGCTGGGTGTGGTGAAGAGCGAA            |
|                                         | Ptp primer2        | GCTATTGGTACCTATCCACCTCCTCTATCCGGTGCTGCATCCAC  |
| subcloning Ptp10D into sJFRC28 vector   | Ptpgfp primer1     | GCTAATGCGGCCGCTGGGTGTGGTGAAGAGCG              |
|                                         | Ptpgfp primer2     | GCTATTGGTACCGCTCCACCTCCTCTATCCGGTGCTGCATCCAC  |
| subcloning Wash to pJFRC-MUH            | Not-wash-Kpn P1    | ATTTTAGCGGCCGCATGGAGGAGTCACCTTACCTGCACAGC     |
|                                         | Not-wash-Kpn P2    | ACTTTCGGTACCCTAGTTCCACCCATCCTCGTCGTCCTCGGAGTG |
| developing HA-Wash constructs           | WashForwGATE       | CACCATGGAGGAGTCACCTTACC                       |
|                                         | WashRevGATEstop    | CTAGTTCCACCCATCCTCGTCG                        |
| developing Btk29A-Flag constructs       | BtkForwGATE        | CACCATGATGGGCACTAAGCAT                        |
|                                         | BtkRevGATEnon      | GTCGGTTAGCGTTTGGGC                            |
